# Supplementary material
Source: Springer Nature journal article supplement (https://www.springermedizin.de/resource/supplementary/12876_2014_1143_MOESM4_ESM.pdf/9438180)

# Country

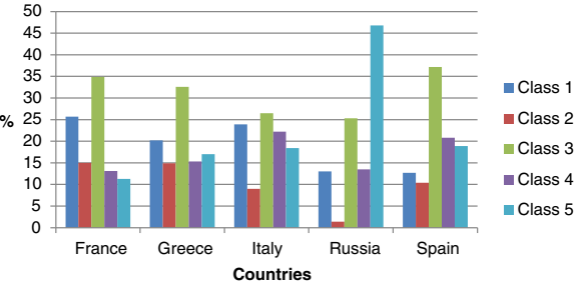

Supplement: MOESM4 [file 9438180]
